# Supplementary material for: Structure and reactivity of [RuII(terpy)(N^N)Cl]Cl complexes: consequences for biological applications
Source: Royal Society of Chemistry journal article supplement (doi:10.1039/c7dt01669g), 2017-01-01
Supplement: c7dt01669g1.pdf [file c7dt01669g1.pdf]

## Electronic Supplementary Information (ESI)

### Structure and reactivity of [Ru<sup>II</sup>(terpy)(N<sup>^</sup>N)Cl]Cl complexes.

#### Consequences for biological applications

Marta Chrzanowska, Anna Katafias,\* Olga Impert, Anna Kozakiewicz, Andrzej Surdykowski,

Paulina Brzozowska, Alicja Franke, Achim Zahl, Ralph Puchta

and Rudi van Eldik\*

#### A. Structure of [Ru<sup>II</sup>(terpy)(bipy)Cl]Cl in solution as determined by NMR spectroscopy

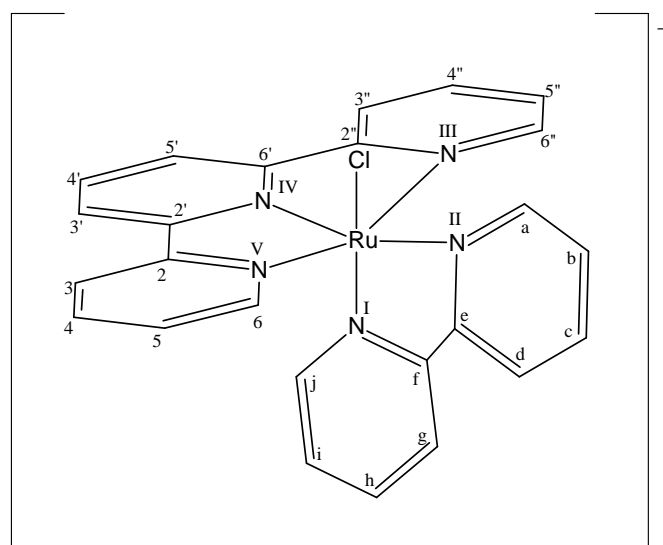

Numbering scheme of terpy and bipy ligands used for NMR characterization

<sup>1</sup>H NMR (DMSO<sub>d-6</sub>): δ 10.09 (d, 1H, J = 5.6 Hz, Ha), 8.92 (d, 1H, J = 8.2 Hz, Hd), 8.82 (d, 2H, J = 8.1 Hz, H3'/H5'), 8.70 (d, 2H, J = 8.1 Hz, H3/H3''), 8.64 (d, 1H, J = 8.1 Hz, Hg), 8.35 (td, 1H, J<sub>1</sub> = 8.0 Hz, J<sub>2</sub> = 1.4 Hz, Hc), 8.21 (t, 1H, J = 8.0 Hz, H4'), 8.06 (ddd, J<sub>1</sub> = 7.0 Hz, J<sub>2</sub> = 5.6 Hz, J<sub>3</sub> = 1.3 Hz, 1H, Hb), 7.98 (td, 2H, J<sub>1</sub> = 7.6 Hz, J<sub>2</sub> = 1.4 Hz, H4/H4''), 7.77 (td, 1H, J<sub>1</sub> = 7.6 Hz, J<sub>2</sub> = 1.5 Hz, Hh), 7.61 (d, 2H, J = 5.6 Hz, H6/H6''), 7.37 (ddd, J<sub>1</sub> = 7.1 Hz, J<sub>2</sub> = 5.5 Hz, J<sub>3</sub> = 1.3 Hz, 2H, H5/H5''), 7.31 (d, 1H, J = 5.6 Hz, Hj), 7.08 (ddd, J<sub>1</sub> = 7.3 Hz, J<sub>2</sub> = 5.8 Hz, J<sub>3</sub> = 1.4 Hz, 1H, Hi)

<sup>13</sup>C NMR (DMSO<sub>d-6</sub>): δ 158.9 (C2/C2''), 158.8 (Cf), 158.0 (C2'/C6'), 156.2 (Ce), 152.4 (Ca), 152.3 (C6/C6''), 152.0 (Cj), 137.5 (C4/C4''), 137.1 (Cc), 136.0 (Ch), 134.3 (C4'), 127.9 (C5/C5''), 127.4 (Cb), 126.9 (Ci), 124.2 (C3/C3''), 124.2 (Cd), 124.0 (Cg), 123.1 (C3'/C5')

<sup>15</sup>N NMR (DMSO<sub>d-6</sub>): δ -91.9 N(IV), -117.2 N(II), -127.6 N(I), -129.6 N(III)/N(V)

Coordination shift of terpy N signals vs free ligand in dmso:

$$\Delta N_{III/V} = -56.6 \text{ ppm}$$

$$\Delta N_{IV} = -8.3 \text{ ppm}$$

## NMR spectra

### <sup>1</sup>H NMR

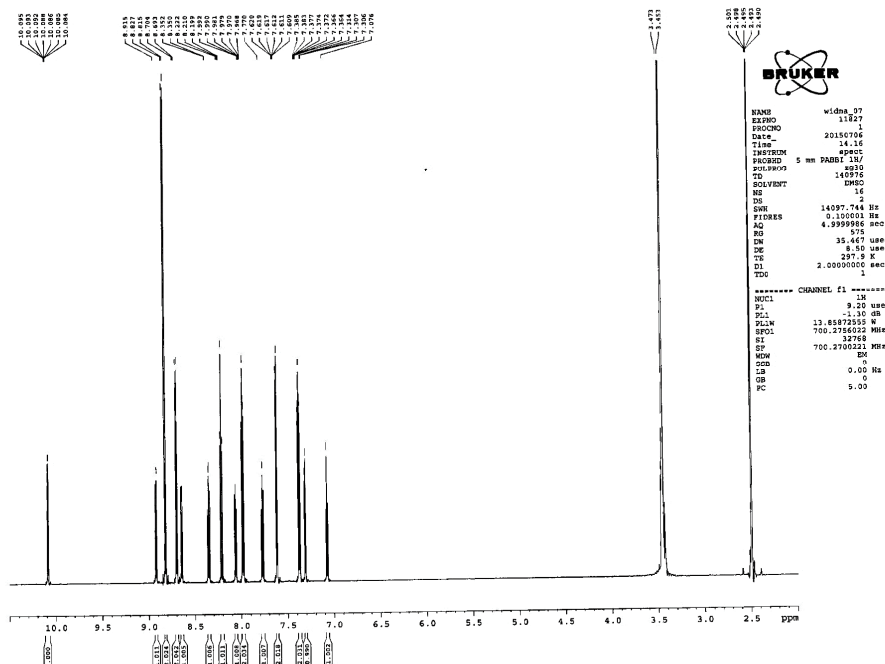

### <sup>13</sup>C NMR

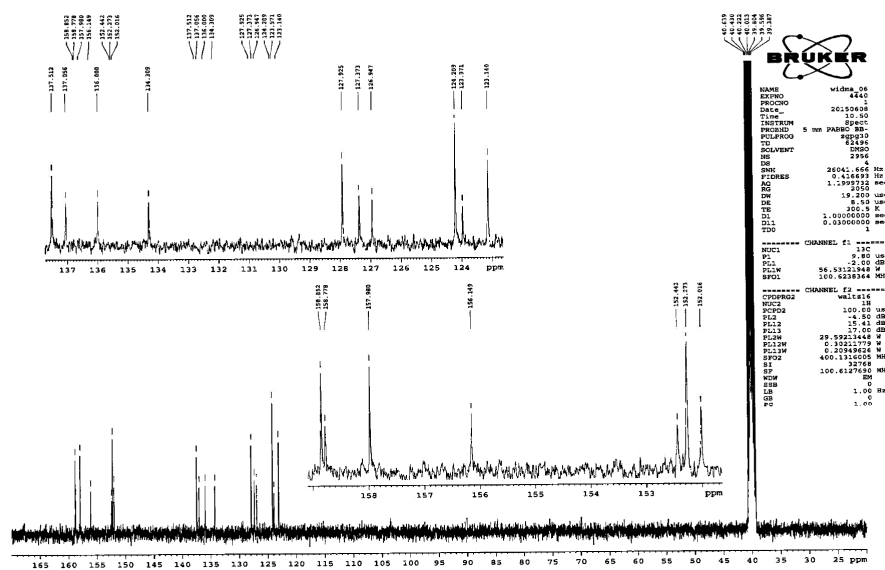

# $^1\text{H}$ - $^{13}\text{C}$ HMBC NMR

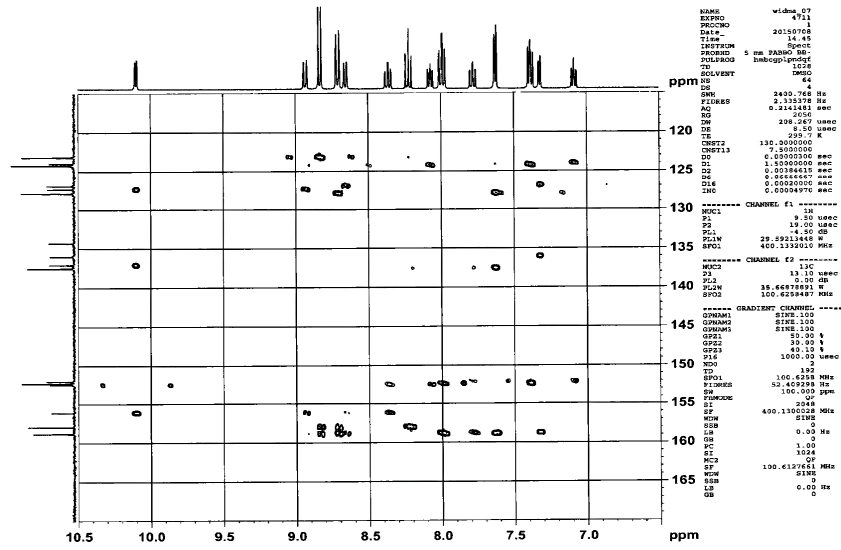

# $^1\text{H}$ - $^{13}\text{C}$ HMQC NMR

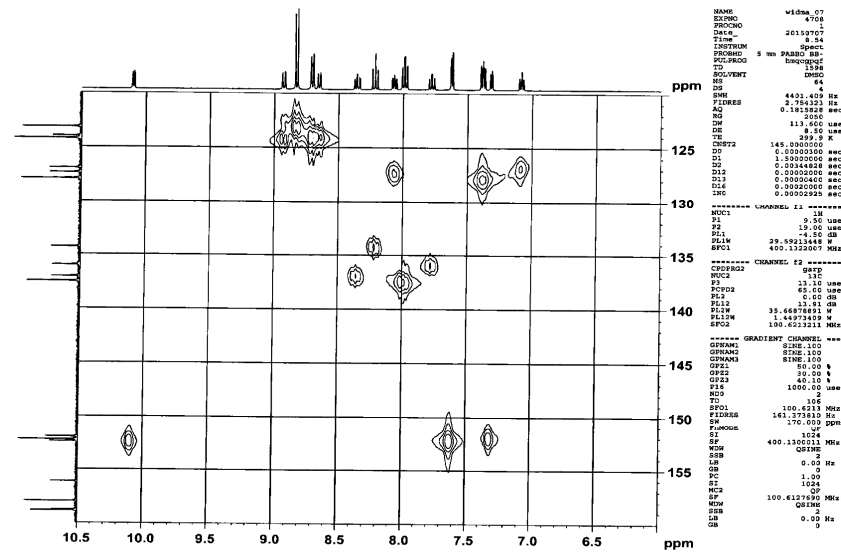

# $^1\text{H}$ - $^{15}\text{N}$ HMQC NMR

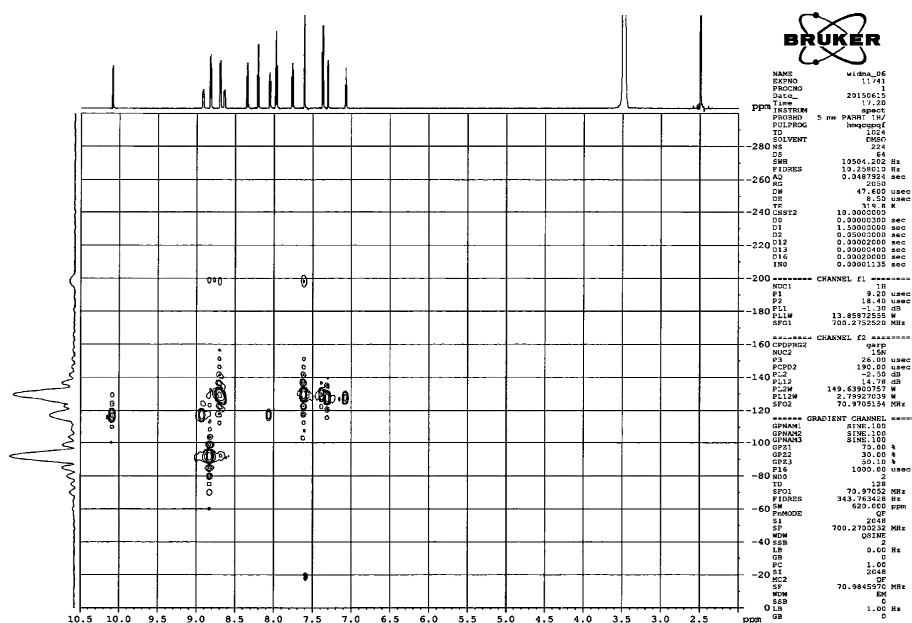

## B. Structure of $[\text{Ru}^{\text{II}}(\text{terpy})(\text{en})\text{Cl}]\text{Cl}$ in solution as determined by NMR spectroscopy

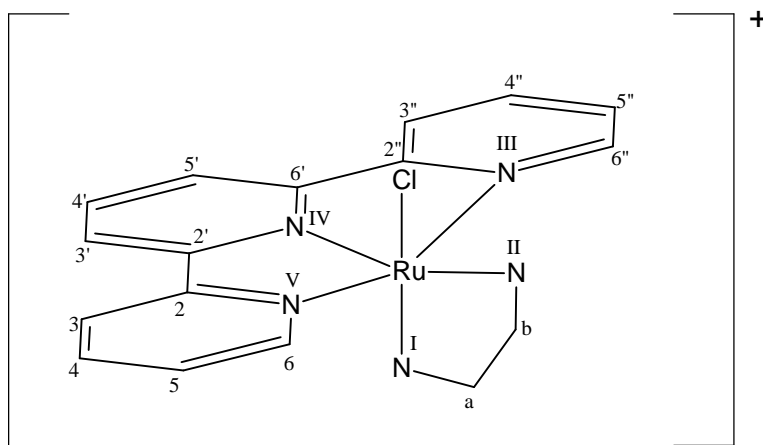

Numbering scheme of terpy and en ligands used for NMR characterization

$^1\text{H}$  NMR ( $\text{DMSO}_{d-6}$ ):  $\delta$  9.15 (d, 2H,  $J = 5.5$  Hz, H6/H6''), 8.60 (d, 2H,  $J = 8.0$  Hz, H3/H3''), 8.56 (d, 2H,  $J = 8.0$  Hz, H3'/H5'), 8.02 (td, 2H,  $J_1 = 7.7$  Hz,  $J_2 = 1.4$  Hz, H4/H4''), 7.77 (t, 1H,  $J = 7.9$  Hz, H4'), 7.71 (ddd, 2H,  $J_1 = 7.1$  Hz,  $J_2 = 5.6$  Hz,  $J_3 = 1.3$  Hz, H5/H5''), 6.20 (t, br, 2H,  $J = 5.8$  Hz,  $\text{NH}_2(\text{II})$ ), 3.02 (m, 2H, Hb), 2.78 (t, br,  $J = 5.2$  Hz,  $\text{NH}_2(\text{I})$ ), 2.11 (m, 2H, Ha)

$^{13}\text{C}$  NMR ( $\text{DMSO}_{d-6}$ ):  $\delta$  161.5 (C2/C2''), 161.5 (C2'/C6'), 154.4 (C6/C6''), 136.5 (C4/C4''), 129.1 (C4'), 127.7 (C5/C5''), 123.7 (C3/C3''), 122.4 (C3'/C5'), 46.5 (Cb), 46.2 (Ca) \* split

$^{15}\text{N}$  NMR ( $\text{DMSO}_{d-6}$ ):  $\delta$  -78.7 N(IV), -128.5 N(III)/N(V), -375.4 N(II), -399.2 N(I)

Coordination shift of terpy N signals vs free ligand in dmsol:

$$\Delta N_{\text{III/V}} = -55.5 \text{ ppm}$$

$\Delta N_{IV} = 4.1 \text{ ppm}$

## NMR spectra

### $^1\text{H}$ NMR

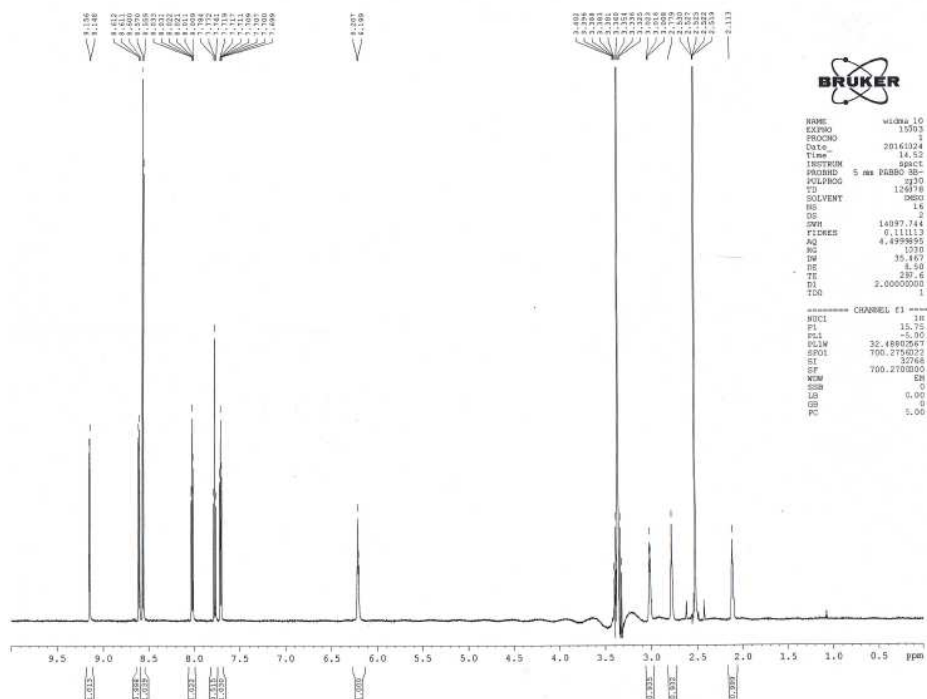

### $^{13}\text{C}$ NMR

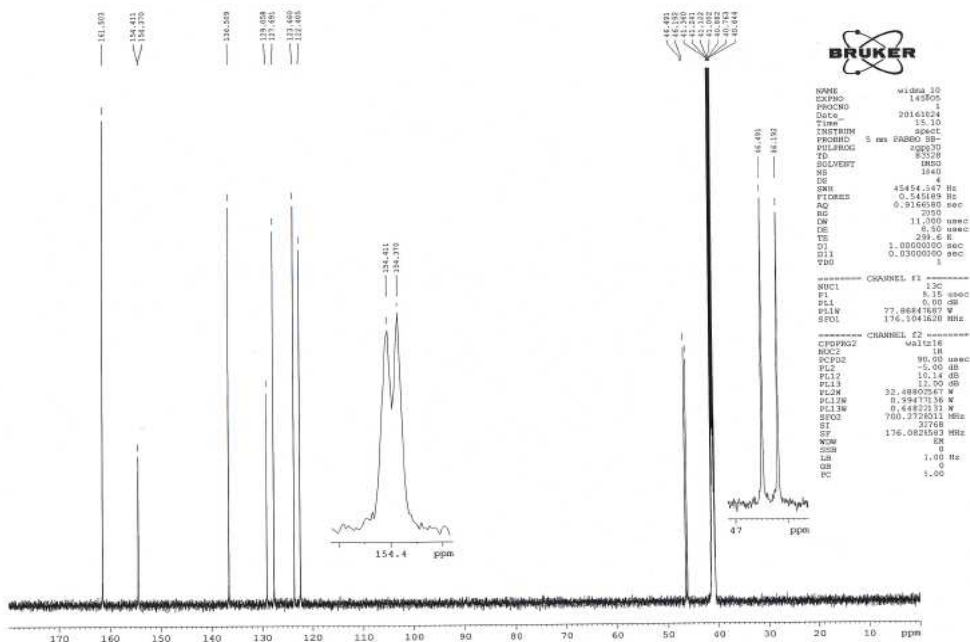

# $^1\text{H}$ - $^{13}\text{C}$ HMBC NMR

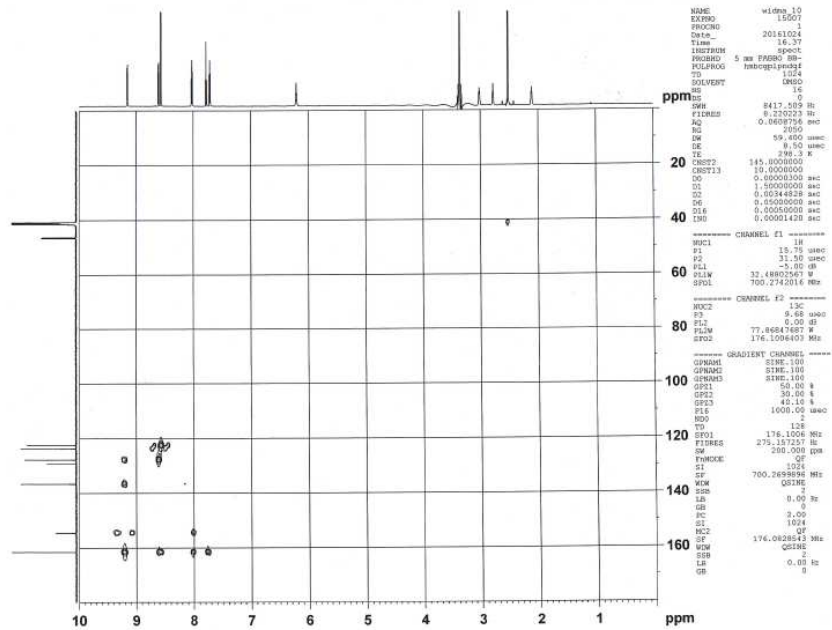

# $^1\text{H}$ - $^{13}\text{C}$ HMQC NMR

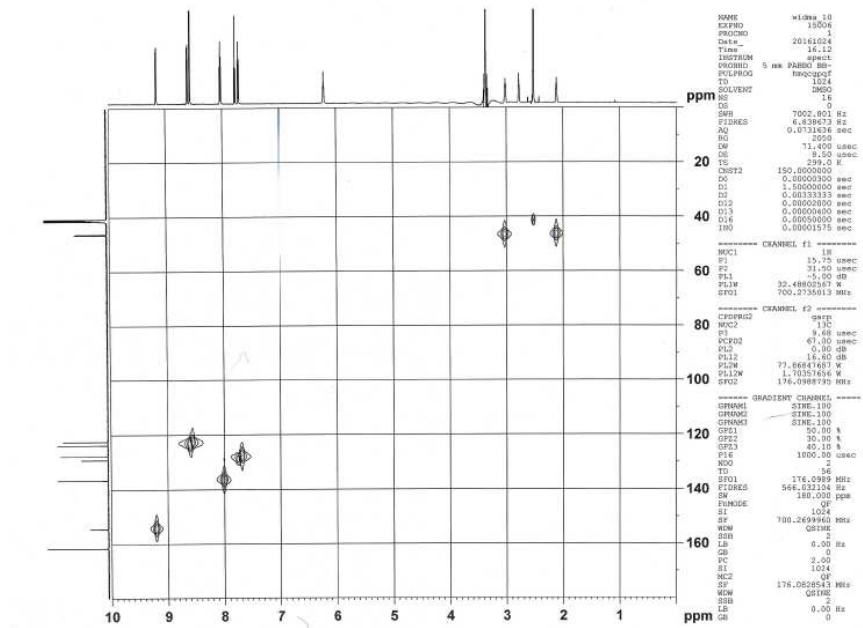

# $^1\text{H}$ - $^{15}\text{N}$ HMQC NMR

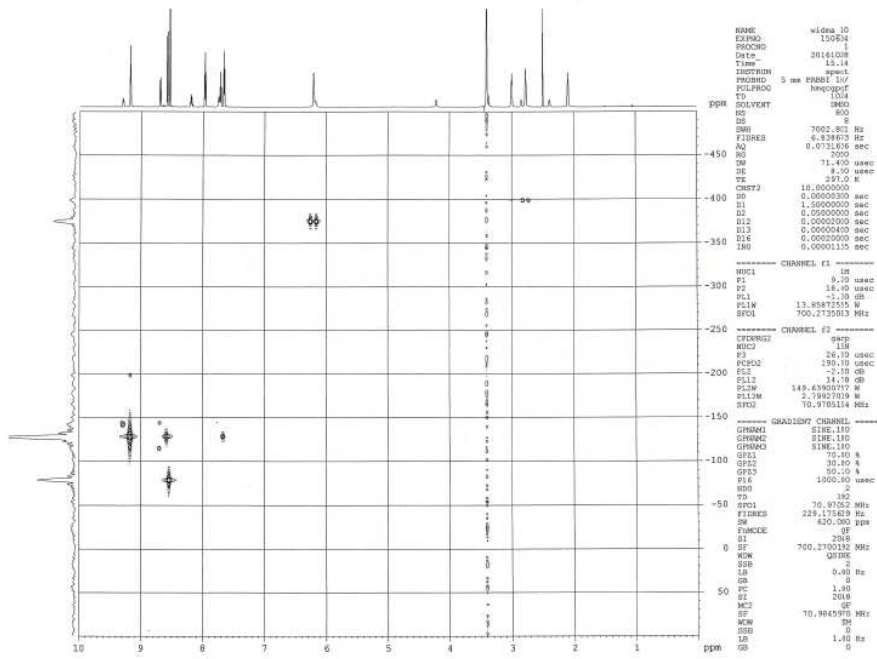

**Table S1.** Dependence of  $k_{\text{obs}}$  on temperature for the reaction of  $[\text{Ru}(\text{terpy})(\text{bipy})(\text{H}_2\text{O})]^{2+}$  with chloride<sup>a</sup>

| $T, ^\circ\text{C}$ | $10^3 k_{\text{obs}}, \text{s}^{-1}$ | $10^3 k_1, \text{M}^{-1} \text{s}^{-1}$ | $\Delta H^\ddagger, \text{kJ mol}^{-1}$ | $\Delta S^\ddagger, \text{J K}^{-1} \text{mol}^{-1}$ |
|---------------------|--------------------------------------|-----------------------------------------|-----------------------------------------|------------------------------------------------------|
| 20.2                | $0.53 \pm 0.03$                      | 0.211                                   | $78 \pm 2$                              | $-46 \pm 5$                                          |
| 29.6                | $1.66 \pm 0.03$                      | 0.666                                   |                                         |                                                      |
| 39.4                | $4.94 \pm 0.02$                      | 1.97                                    |                                         |                                                      |
| 49.3                | $12.5 \pm 0.1$                       | 5.01                                    |                                         |                                                      |

<sup>a</sup> Experimental conditions:  $[\text{Ru}(\text{II})] = 7.1 \times 10^{-5} \text{ M}$ ,  $[\text{Cl}^-] = 2.5 \text{ M}$ ,  $I = 2.5 \text{ M}$  (NaCl).

**Table S2.** Dependence of  $k_{\text{obs}}$  on temperature for the reaction of  $[\text{Ru}(\text{terpy})(\text{bipy})(\text{H}_2\text{O})]^{2+}$  with thiourea<sup>a</sup>

| $T, ^\circ\text{C}$ | $10^3 k_{\text{obs}}, \text{s}^{-1}$ | $10^3 k_2, \text{M}^{-1} \text{s}^{-1}$ | $\Delta H^\ddagger, \text{kJ mol}^{-1}$ | $\Delta S^\ddagger, \text{J K}^{-1} \text{mol}^{-1}$ |
|---------------------|--------------------------------------|-----------------------------------------|-----------------------------------------|------------------------------------------------------|
| 26.4                | $0.18 \pm 0.02$                      | 0.60                                    | $82.9 \pm 0.8$                          | $-29 \pm 2$                                          |
| 30.9                | $0.35 \pm 0.03$                      | 1.16                                    |                                         |                                                      |
| 36.3                | $0.62 \pm 0.04$                      | 2.08                                    |                                         |                                                      |
| 43.6                | $1.33 \pm 0.01$                      | 4.42                                    |                                         |                                                      |
| 51.8                | $3.01 \pm 0.02$                      | 10.0                                    |                                         |                                                      |

<sup>a</sup> Experimental conditions:  $[\text{Ru}(\text{II})] = 5.9 \times 10^{-5} \text{ M}$ ,  $[\text{TU}] = 0.3 \text{ M}$ ,  $I = 0.1 \text{ M}$  (NaNO<sub>3</sub>).

**Table S3.** Dependence of  $k_{\text{obs}}$  on temperature for the reaction of  $[\text{Ru}(\text{terpy})(\text{en})(\text{H}_2\text{O})]^{2+}$  with thiourea<sup>a</sup>

| $T, ^\circ\text{C}$ | $10^3 k_{\text{obs}}, \text{s}^{-1}$ | $10^3 k_2, \text{M}^{-1} \text{s}^{-1}$ | $\Delta H^\ddagger, \text{kJ mol}^{-1}$ | $\Delta S^\ddagger, \text{J K}^{-1} \text{mol}^{-1}$ |
|---------------------|--------------------------------------|-----------------------------------------|-----------------------------------------|------------------------------------------------------|
| 10.8                | $1.53 \pm 0.02$                      | 7.64                                    | $65 \pm 2$                              | $-55 \pm 6$                                          |
| 16.0                | $2.76 \pm 0.01$                      | 13.8                                    |                                         |                                                      |
| 20.5                | $4.29 \pm 0.05$                      | 21.4                                    |                                         |                                                      |
| 25.5                | $7.53 \pm 0.01$                      | 37.7                                    |                                         |                                                      |
| 30.5                | $11.2 \pm 0.2$                       | 56.2                                    |                                         |                                                      |
| 34.8                | $16.0 \pm 0.2$                       | 80.1                                    |                                         |                                                      |

<sup>a</sup> Experimental conditions:  $[\text{Ru}(\text{II})] = 1.2 \times 10^{-4} \text{ M}$ ,  $[\text{TU}] = 0.2 \text{ M}$ ,  $I = 0.1 \text{ M}$  (NaNO<sub>3</sub>).



**Table S4.** Dependence of  $k_{\text{obs}}$  on temperature for the reaction of  $[\text{Ru}(\text{terpy})(\text{en})(\text{H}_2\text{O})]^{2+}$  with cyanide<sup>a</sup>

| $T, ^\circ\text{C}$ | $10^4 k_{\text{obs}}, \text{s}^{-1}$ | $10^3 k_3, \text{M}^{-1} \text{s}^{-1}$ | $\Delta H^\ddagger, \text{kJ mol}^{-1}$ | $\Delta S^\ddagger, \text{J K}^{-1} \text{mol}^{-1}$ |
|---------------------|--------------------------------------|-----------------------------------------|-----------------------------------------|------------------------------------------------------|
| 11.5                | $2.28 \pm 0.03$                      | 4.55                                    | $83 \pm 2$                              | $+2 \pm 6$                                           |
| 17.7                | $4.50 \pm 0.01$                      | 9.00                                    |                                         |                                                      |
| 22.4                | $7.90 \pm 0.01$                      | 15.8                                    |                                         |                                                      |
| 27.7                | $15.4 \pm 0.2$                       | 30.7                                    |                                         |                                                      |
| 31.3                | $22.4 \pm 0.5$                       | 44.7                                    |                                         |                                                      |

<sup>a</sup> Experimental conditions:  $[\text{Ru}(\text{II})] = 1.9 \times 10^{-4} \text{ M}$ ,  $[\text{CN}^-] = 0.05 \text{ M}$ ,  $\text{pH} = 10.5$ ,  $I = 1 \text{ M}$  ( $\text{NaNO}_3$ ).

**Table S5.** Summary of computational data for water exchange reactions on complexes of the type  $[\text{Ru}(\text{terpy})(\text{N}^{\wedge}\text{N})(\text{OH}_2)]^{2+}$ . All ZPE corrections were derived from the B3LYP/def2svp-calculations; GS: ground state, TS: transition state

| $[\text{Ru}(\text{terpy})(\text{bipy})(\text{H}_2\text{O})]^{2+} + \text{H}_2\text{O}$                                                    | $E_{\text{tot}}$ (GS)<br>[a.u.] | ZPE (TS)<br>[kcal mol <sup>-1</sup> ] | $E_{\text{tot}}$ (TS)<br>[a.u.] | ZPE (TS)<br>[kcal mol <sup>-1</sup> ] | $\Delta E_{\text{tot}}$<br>[kcal mol <sup>-1</sup> ] | $\Delta\text{ZPE}$<br>[kcal mol <sup>-1</sup> ] | $\Delta E$<br>[kcal mol <sup>-1</sup> ] |
|-------------------------------------------------------------------------------------------------------------------------------------------|---------------------------------|---------------------------------------|---------------------------------|---------------------------------------|------------------------------------------------------|-------------------------------------------------|-----------------------------------------|
| B3LYP/def2svp                                                                                                                             | -1484.34842                     | 278.14                                | -1484.31095                     | 277.08                                | 23.51                                                | -1.06                                           | 22.46                                   |
| B3LYP/def2tzvp//B3LYP/def2svp                                                                                                             | -1485.87659                     | 278.14                                | -1485.84246                     | 277.08                                | 21.42                                                | -1.06                                           | 20.36                                   |
| B3LYP(CPCM)/def2tzvp//B3LYP/def2svp                                                                                                       | -1486.07068                     | 278.14                                | -1486.03999                     | 277.08                                | 19.26                                                | -1.06                                           | 18.20                                   |
| $\omega$ B97XD/def2tzvp//B3LYP/def2svp                                                                                                    | -1485.39353                     | 278.14                                | -1485.35949                     | 277.08                                | 21.36                                                | -1.06                                           | 20.30                                   |
| $\omega$ B97XD(CPCM)/def2tzvp//B3LYP/def2svp                                                                                              | -1485.58665                     | 278.14                                | -1485.55585                     | 277.08                                | 19.33                                                | -1.06                                           | 18.27                                   |
| $[\text{Ru}(\text{terpy})(\text{en})(\text{H}_2\text{O})]^{2+} + \text{H}_2\text{O}$<br>( $\text{H}_2\text{O}\cdots\text{H}_2\text{NR}$ ) | $E_{\text{tot}}$ (GS)<br>[a.u.] | ZPE (TS)<br>[kcal mol <sup>-1</sup> ] | $E_{\text{tot}}$ (TS)<br>[a.u.] | ZPE (TS)<br>[kcal mol <sup>-1</sup> ] | $\Delta E_{\text{tot}}$<br>[kcal mol <sup>-1</sup> ] | $\Delta\text{ZPE}$<br>[kcal mol <sup>-1</sup> ] | $\Delta E$<br>[kcal mol <sup>-1</sup> ] |
| B3LYP/def2svp                                                                                                                             | -1179.67674                     | 249.64                                | -1179.64548                     | 248.92                                | 19.61                                                | -0.72                                           | 18.89                                   |
| B3LYP/def2tzvp//B3LYP/def2svp                                                                                                             | -1180.88637                     | 249.64                                | -1180.85924                     | 248.92                                | 17.03                                                | -0.72                                           | 16.31                                   |
| B3LYP(CPCM)/def2tzvp//B3LYP/def2svp                                                                                                       | -1181.09945                     | 249.64                                | -1181.07502                     | 248.92                                | 15.32                                                | -0.72                                           | 14.60                                   |
| $\omega$ B97XD/def2tzvp//B3LYP/def2svp                                                                                                    | -1180.52312                     | 249.64                                | -1180.49519                     | 248.92                                | 17.53                                                | -0.72                                           | 16.81                                   |
| $\omega$ B97XD(CPCM)/def2tzvp//B3LYP/def2svp                                                                                              | -1180.73480                     | 249.64                                | -1180.70959                     | 248.92                                | 15.82                                                | -0.72                                           | 15.10                                   |
| $[\text{Ru}(\text{terpy})(\text{en})(\text{H}_2\text{O})]^{2+} + \text{H}_2\text{O}$<br>( $\text{H}_2\text{O}\cdots\text{H}_2\text{O}$ )  | $E_{\text{tot}}$ (GS)<br>[a.u.] | ZPE (TS)<br>[kcal mol <sup>-1</sup> ] | $E_{\text{tot}}$ (TS)<br>[a.u.] | ZPE (TS)<br>[kcal mol <sup>-1</sup> ] | $\Delta E_{\text{tot}}$<br>[kcal mol <sup>-1</sup> ] | $\Delta\text{ZPE}$<br>[kcal mol <sup>-1</sup> ] | $\Delta E$<br>[kcal mol <sup>-1</sup> ] |
| B3LYP/def2svp                                                                                                                             | -1179.68161                     | 249.84                                | -1179.64548                     | 248.92                                | 22.67                                                | -0.92                                           | 21.75                                   |
| B3LYP/def2tzvp//B3LYP/def2svp                                                                                                             | -1180.89147                     | 249.84                                | -1180.85924                     | 248.92                                | 20.23                                                | -0.92                                           | 19.30                                   |
| B3LYP(CPCM)/def2tzvp//B3LYP/def2svp                                                                                                       | -1181.10494                     | 249.84                                | -1181.07502                     | 248.92                                | 18.77                                                | -0.92                                           | 17.85                                   |
| $\omega$ B97XD/def2tzvp//B3LYP/def2svp                                                                                                    | -1180.52738                     | 249.84                                | -1180.49519                     | 248.92                                | 20.20                                                | -0.92                                           | 19.28                                   |
| $\omega$ B97XD(CPCM)/def2tzvp//B3LYP/def2svp                                                                                              | -1180.73959                     | 249.84                                | -1180.70959                     | 248.92                                | 18.83                                                | -0.92                                           | 17.91                                   |

| [Ru(terpy)(enMe <sub>2</sub> )(H <sub>2</sub> O)] <sup>2+</sup> + H <sub>2</sub> O | E <sub>tot</sub> (GS)<br>[a.u.] | ZPE (TS)<br>[kcal mol <sup>-1</sup> ] | E <sub>tot</sub> (TS)<br>[a.u.] | ZPE (TS)<br>[kcal mol <sup>-1</sup> ] | ΔE <sub>tot</sub><br>[kcal mol <sup>-1</sup> ] | ΔZPE<br>[kcal mol <sup>-1</sup> ] | ΔE<br>[kcal mol <sup>-1</sup> ] |
|------------------------------------------------------------------------------------|---------------------------------|---------------------------------------|---------------------------------|---------------------------------------|------------------------------------------------|-----------------------------------|---------------------------------|
| B3LYP/def2svp                                                                      | -1258.22194                     | 285.10                                | -1258.18508                     | 284.40                                | 23.13                                          | -0.70                             | 22.43                           |
| B3LYP/def2tzvp//B3LYP/def2svp                                                      | -1259.51685                     | 285.10                                | -1259.48259                     | 284.40                                | 21.50                                          | -0.70                             | 20.80                           |
| B3LYP(CPCM)/def2tzvp//B3LYP/def2svp                                                | -1259.72423                     | 285.10                                | -1259.69428                     | 284.40                                | 18.79                                          | -0.70                             | 18.09                           |
| ωB97XD/def2tzvp//B3LYP/def2svp                                                     | -1259.13554                     | 285.10                                | -1259.10210                     | 284.40                                | 20.98                                          | -0.70                             | 20.28                           |
| ωB97XD(CPCM)/def2tzvp//B3LYP/def2svp                                               | -1259.34172                     | 285.10                                | -1259.31246                     | 284.40                                | 18.36                                          | -0.70                             | 17.66                           |

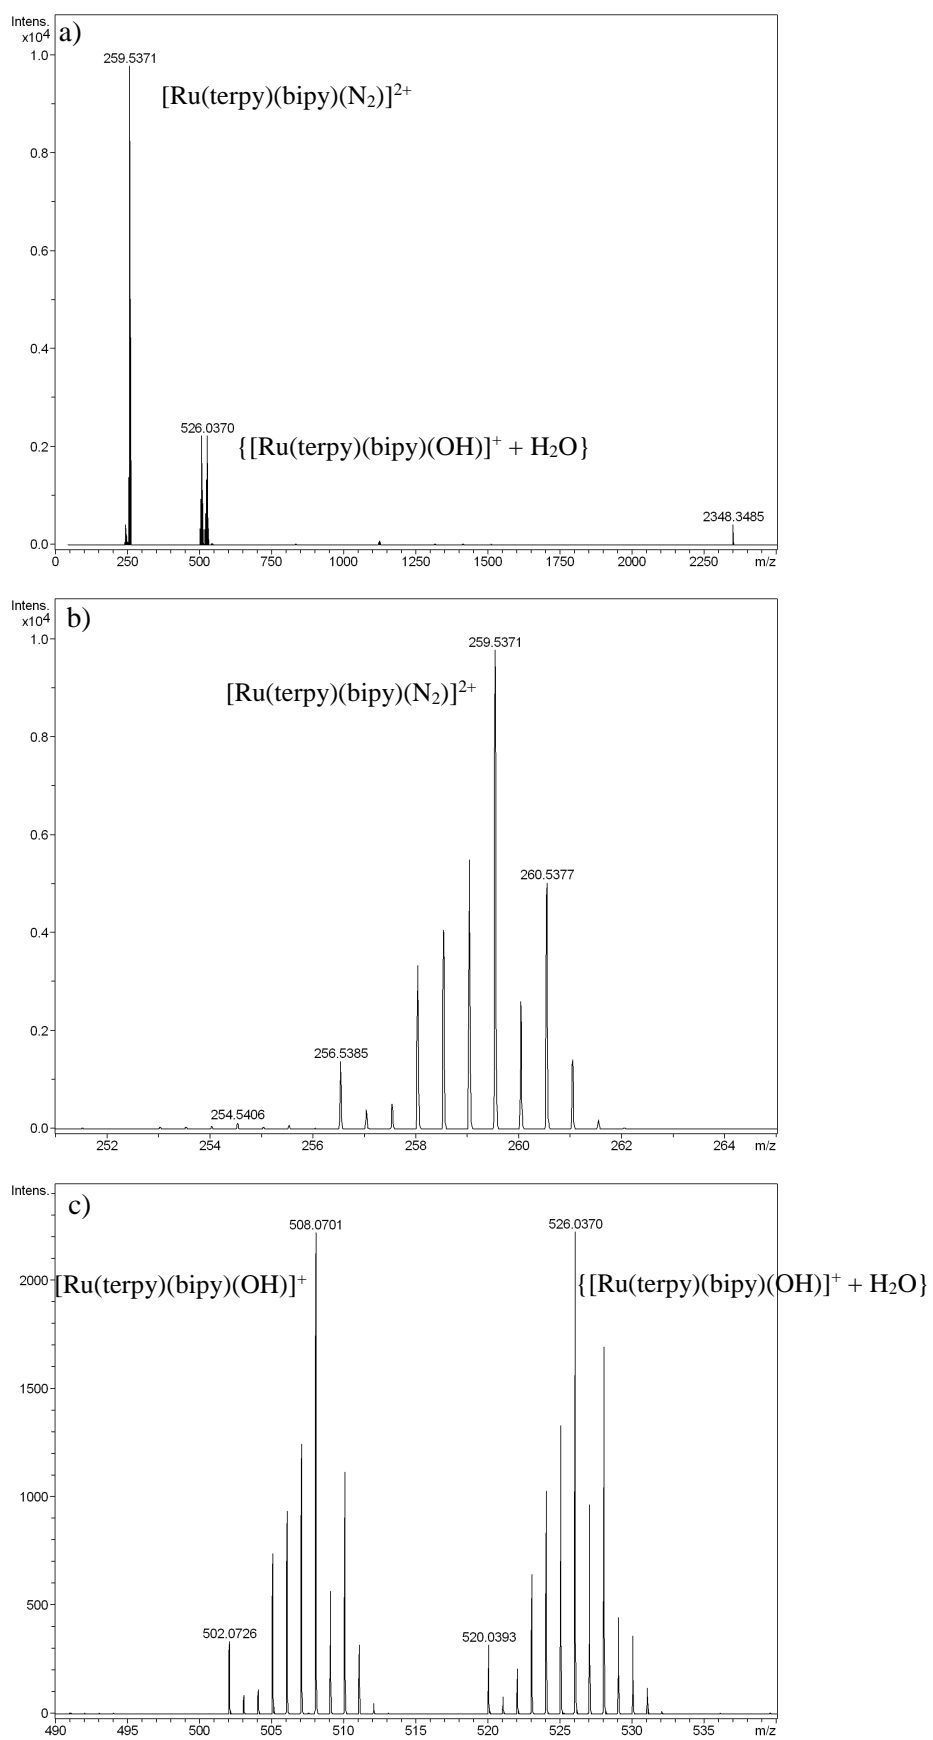

**Figure S1.** ESI-MS spectra of  $[\text{Ru}(\text{terpy})(\text{bipy})(\text{H}_2\text{O})]^{2+}$ .

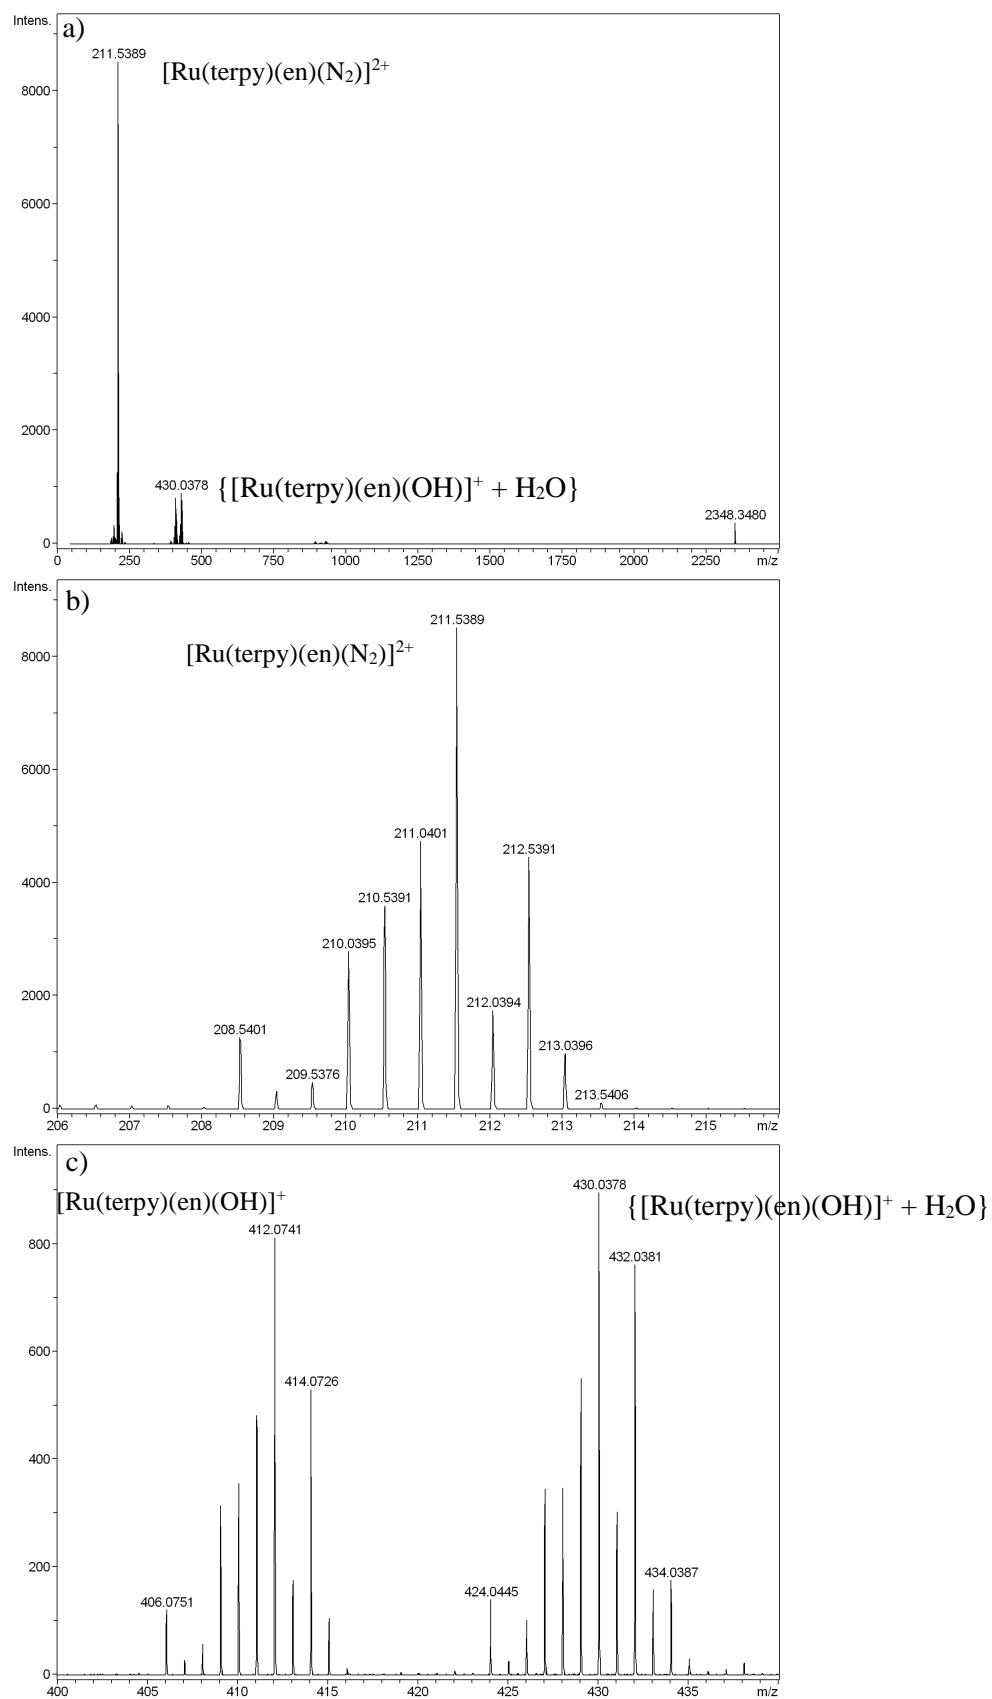

**Figure S2.** ESI-MS spectra of  $[\text{Ru}(\text{terpy})(\text{en})(\text{H}_2\text{O})]^{2+}$ .

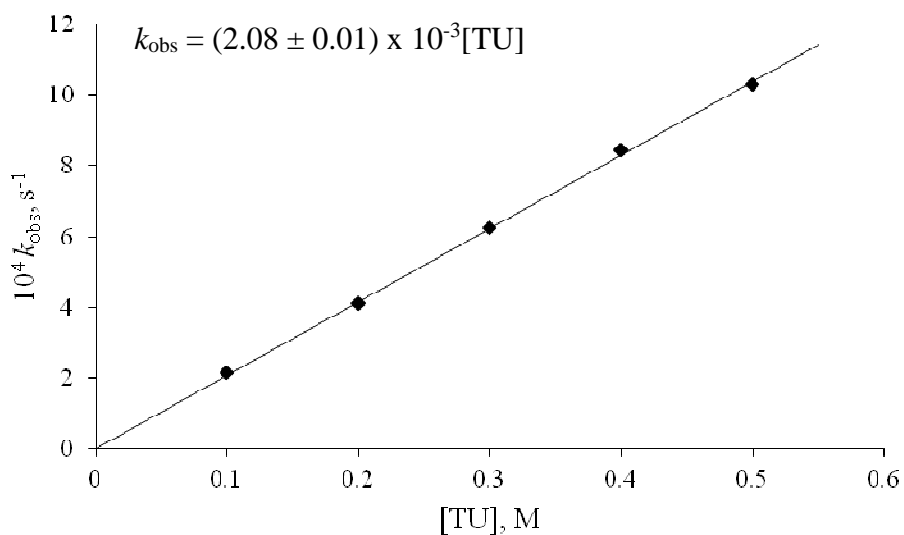

**Figure S3.** Plot of  $k_{\text{obs}}$  versus thiourea concentration for the reaction of  $[\text{Ru}^{\text{II}}(\text{terpy})(\text{bipy})(\text{H}_2\text{O})]^{2+}$  with thiourea. Experimental conditions:  $[\text{Ru}(\text{II})] = 5.9 \times 10^{-5} \text{ M}$ ,  $I = 0.1 \text{ M}$  ( $\text{NaNO}_3$ ),  $T = 36.3 \text{ }^\circ\text{C}$ .

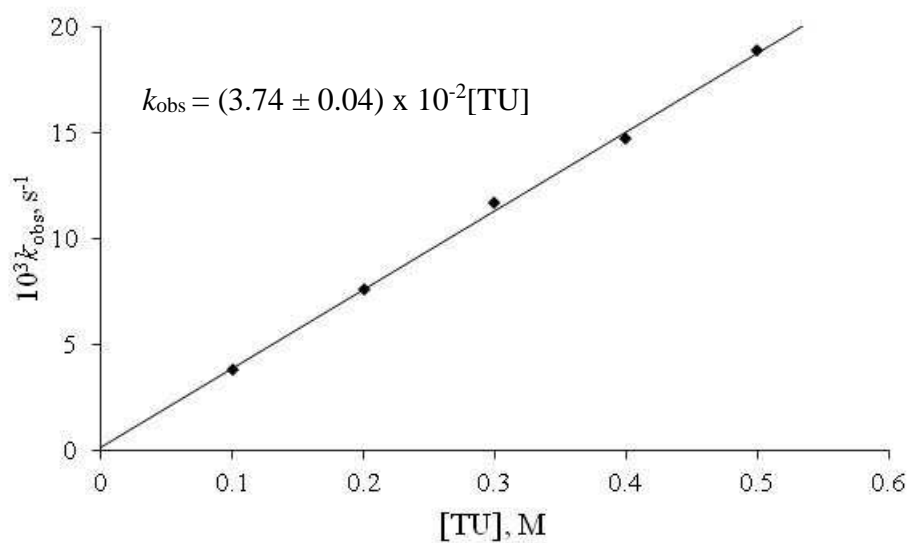

**Figure S4.** Plot of  $k_{\text{obs}}$  versus thiourea concentration for the reaction of  $[\text{Ru}^{\text{II}}(\text{terpy})(\text{en})(\text{H}_2\text{O})]^{2+}$  with thiourea. Experimental conditions:  $[\text{Ru}(\text{II})] = 1.2 \times 10^{-4} \text{ M}$ ,  $I = 0.1 \text{ M}$  ( $\text{NaNO}_3$ ),  $T = 25 \text{ }^\circ\text{C}$ .

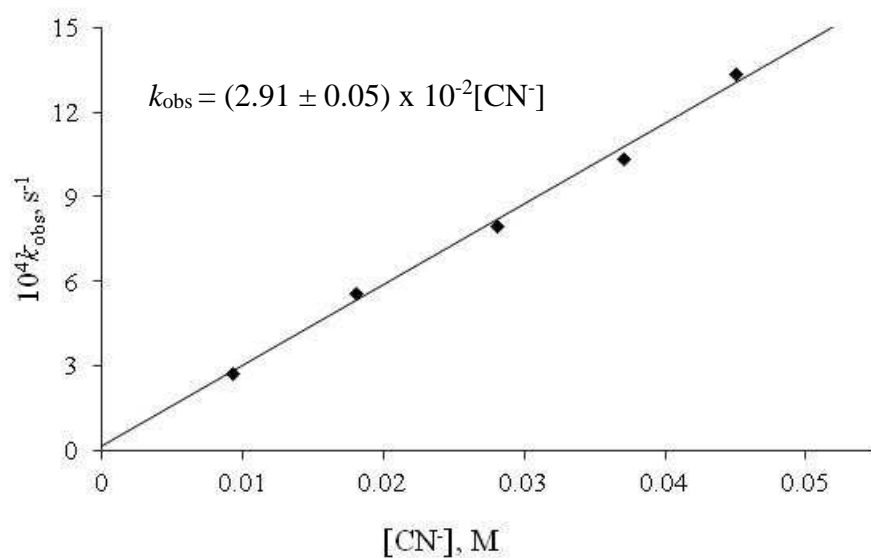

**Figure S5.** Plot of  $k_{\text{obs}}$  versus cyanide concentration for the reaction of  $[\text{Ru}^{\text{II}}(\text{terpy})(\text{en})(\text{H}_2\text{O})]^{2+}$  with cyanide. Experimental conditions:  $[\text{Ru}(\text{II})] = 1.9 \times 10^{-4} \text{ M}$ ,  $\text{pH} = 10.25$ ,  $I = 1 \text{ M}$  ( $\text{NaNO}_3$ ),  $T = 25 \text{ }^\circ\text{C}$ .

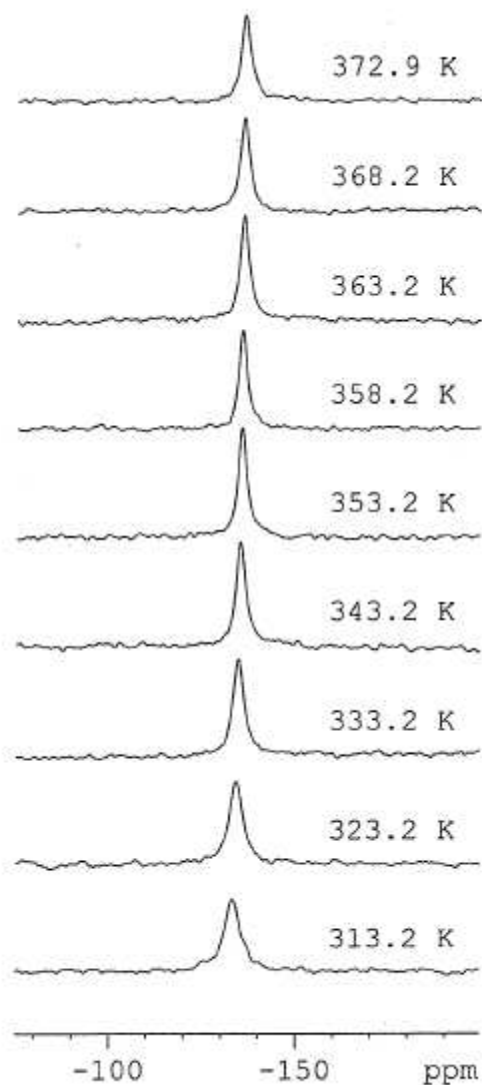

**Figure S6.** 54.24 MHz  $^{17}\text{O}$ -NMR spectra of 0.03 M  $[\text{Ru}^{\text{II}}(\text{terpy})(\text{en})(\text{H}_2\text{O})]^{2+}$  in aqueous solution containing 30% (v/v) of 10%-enriched  $^{17}\text{OH}_2$  and 0.1 M  $\text{MnSO}_4$ . The spectra were recorded in the temperature range from 313.2 to 372.9 K and are the result of 30k (30720) scans using a relaxation delay of 0.15 s, an acquisition time of 0.1 s and a pulse width of 16.7  $\mu\text{s}$  in the quadratic detection mode.
